# Supplementary material for: Strain-Dependent Impact of G and SH Deletions Provide New Insights for Live-Attenuated HMPV Vaccine Development
Source: PubMed Central journal article supplement (PMC6963613; doi:10.3390/vaccines7040164), 2019-10-30
Supplement: vaccines-07-00164-s001.pdf [file vaccines-07-00164-s001.pdf]

**Figure A1. HMPV-immunized mice showed significant differences in histopathology 5 days after viral challenge.**

After intranasal immunization with  $5 \times 10^5$  TCID<sub>50</sub> of  $\Delta$ SH-C-85473,  $\Delta$ G-C-85473 or WT rC85473 virus, mice were inoculated with  $1 \times 10^6$  TCID<sub>50</sub> (LD<sub>50</sub>) of rC-85473 3-weeks later. Tissues observations ( $\times 100$  magnification) and measure of pulmonary edema scores were performed on mice lungs on day 5 post-challenge (n=2).

|                                               |                                                                                     | pulmonary edema score |
|-----------------------------------------------|-------------------------------------------------------------------------------------|-----------------------|
| challenged mice mock-immunized                | 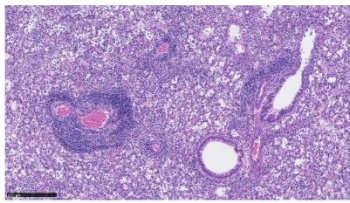   | 1.5                   |
| challenged mice rC-85473 WT immunized         |    | 0                     |
| challenged mice $\Delta$ SH-C-85473 immunized |  | 0                     |
| challenged mice $\Delta$ G-C-85473 immunized  |  | 0                     |
